# Supplementary material
Source: PubMed Central journal article supplement (PMC4666837)

sFigure 1

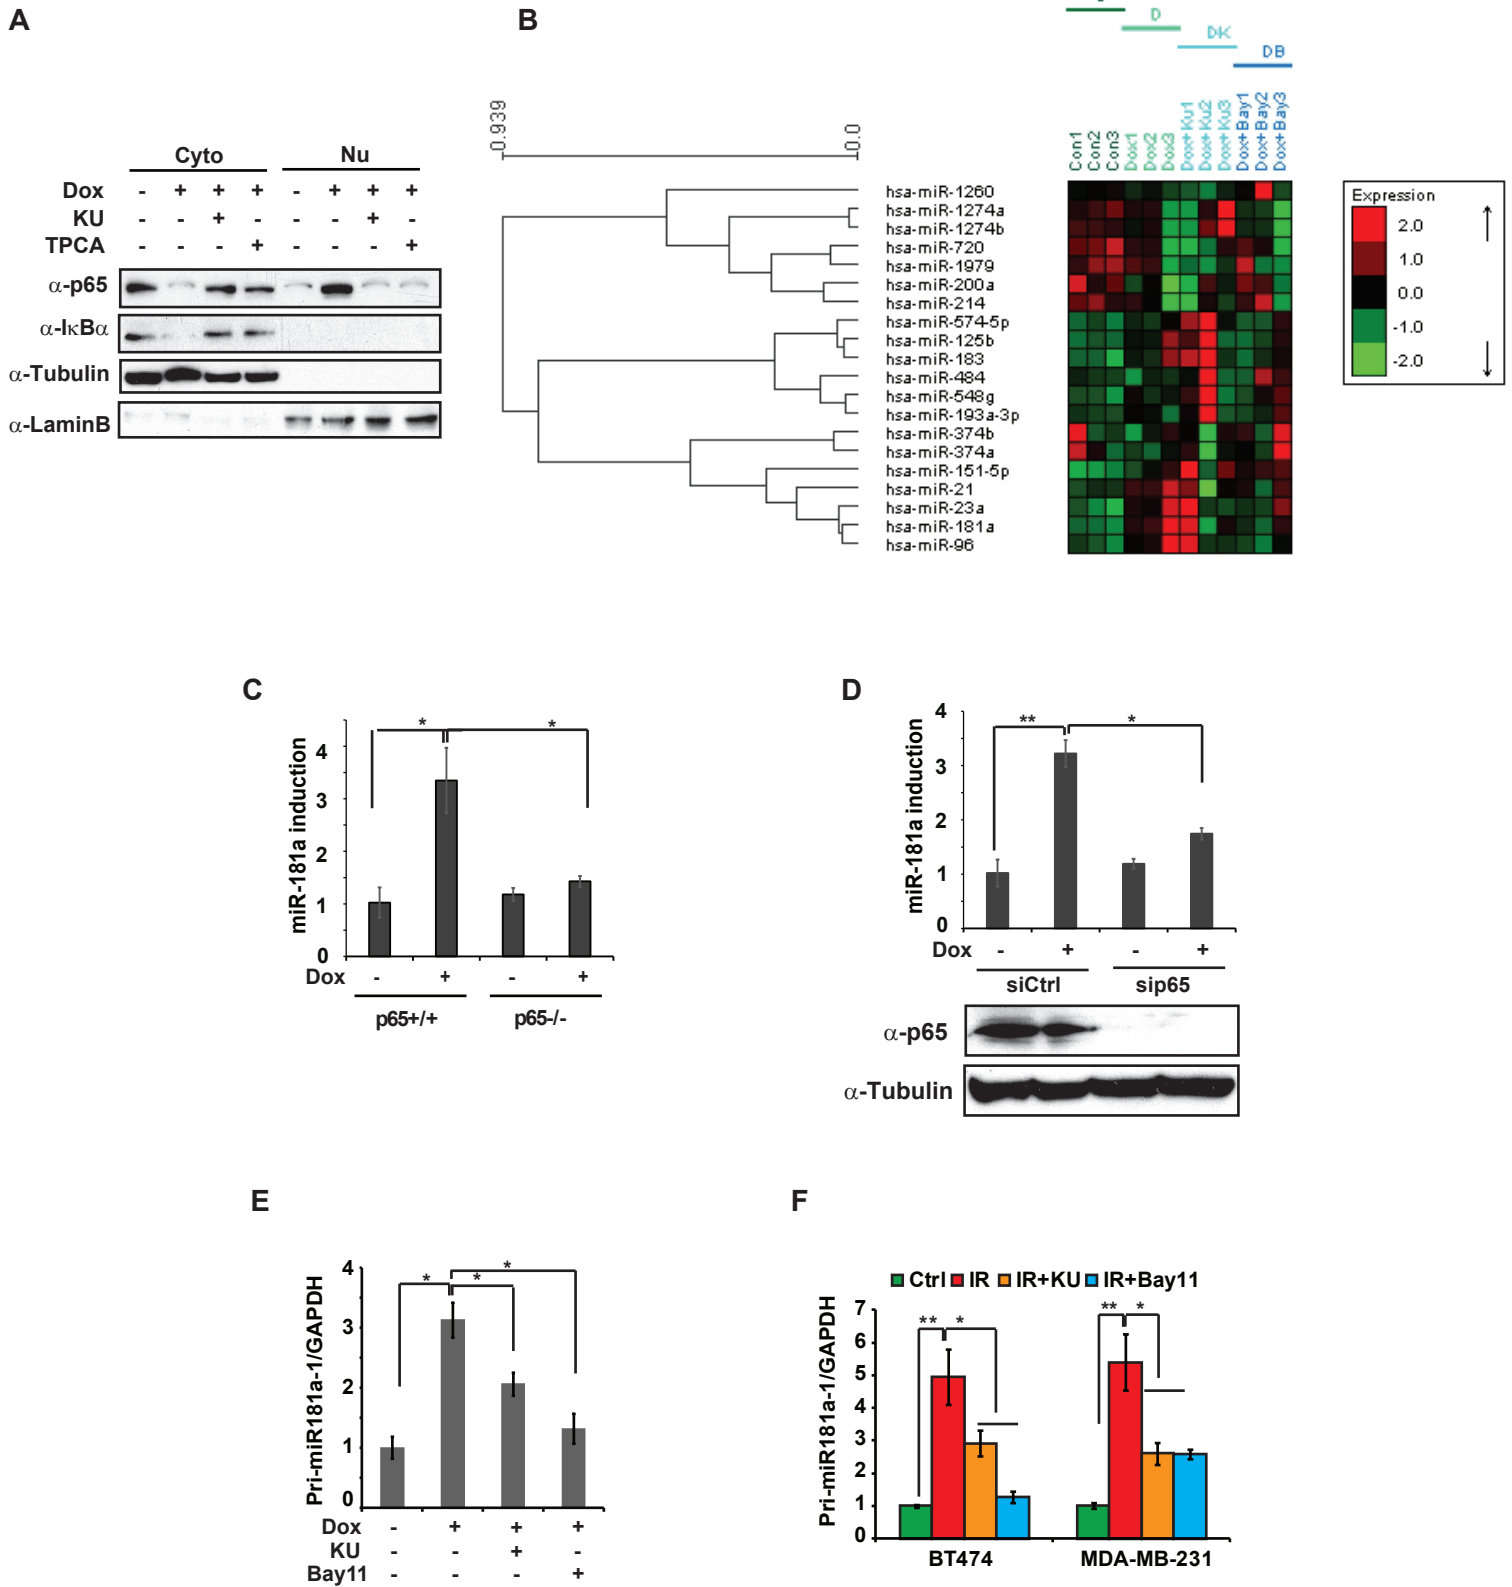

sFigure 2

A

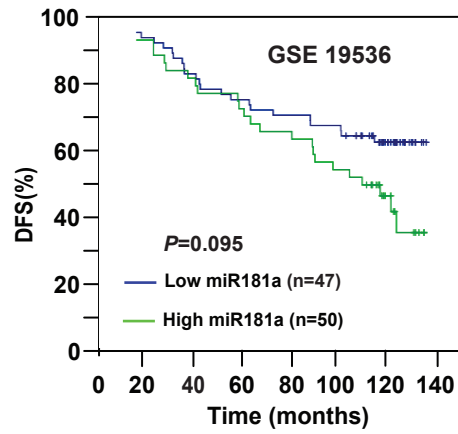

B

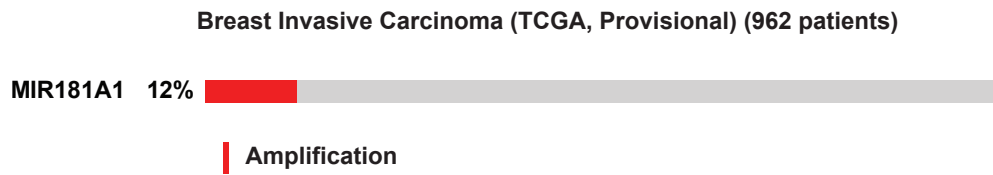

C

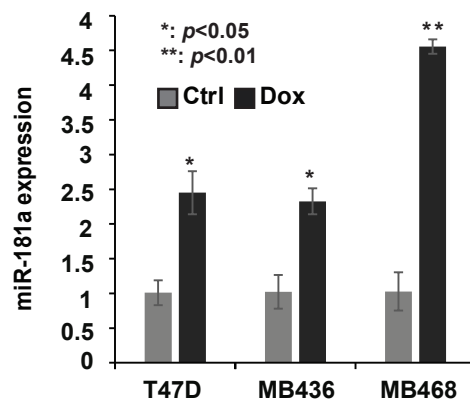

sFigure 3

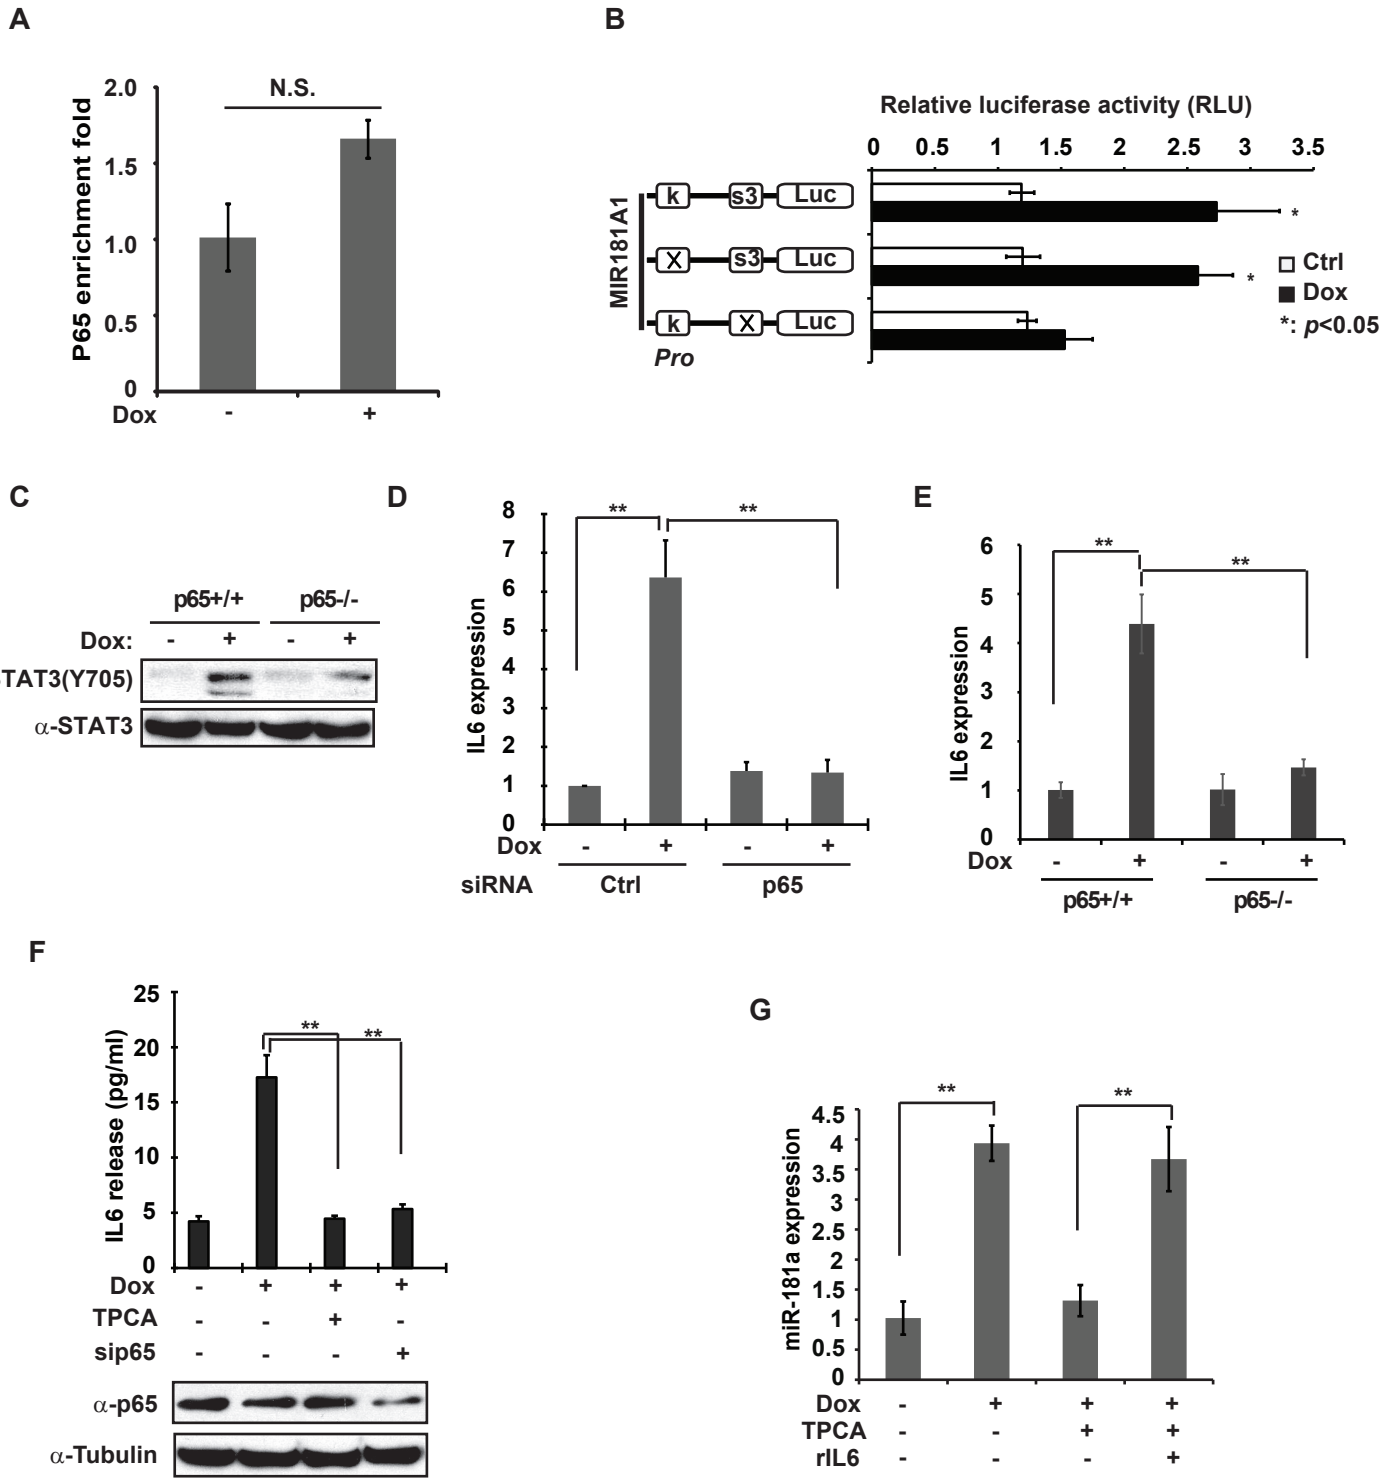

sFigure 4

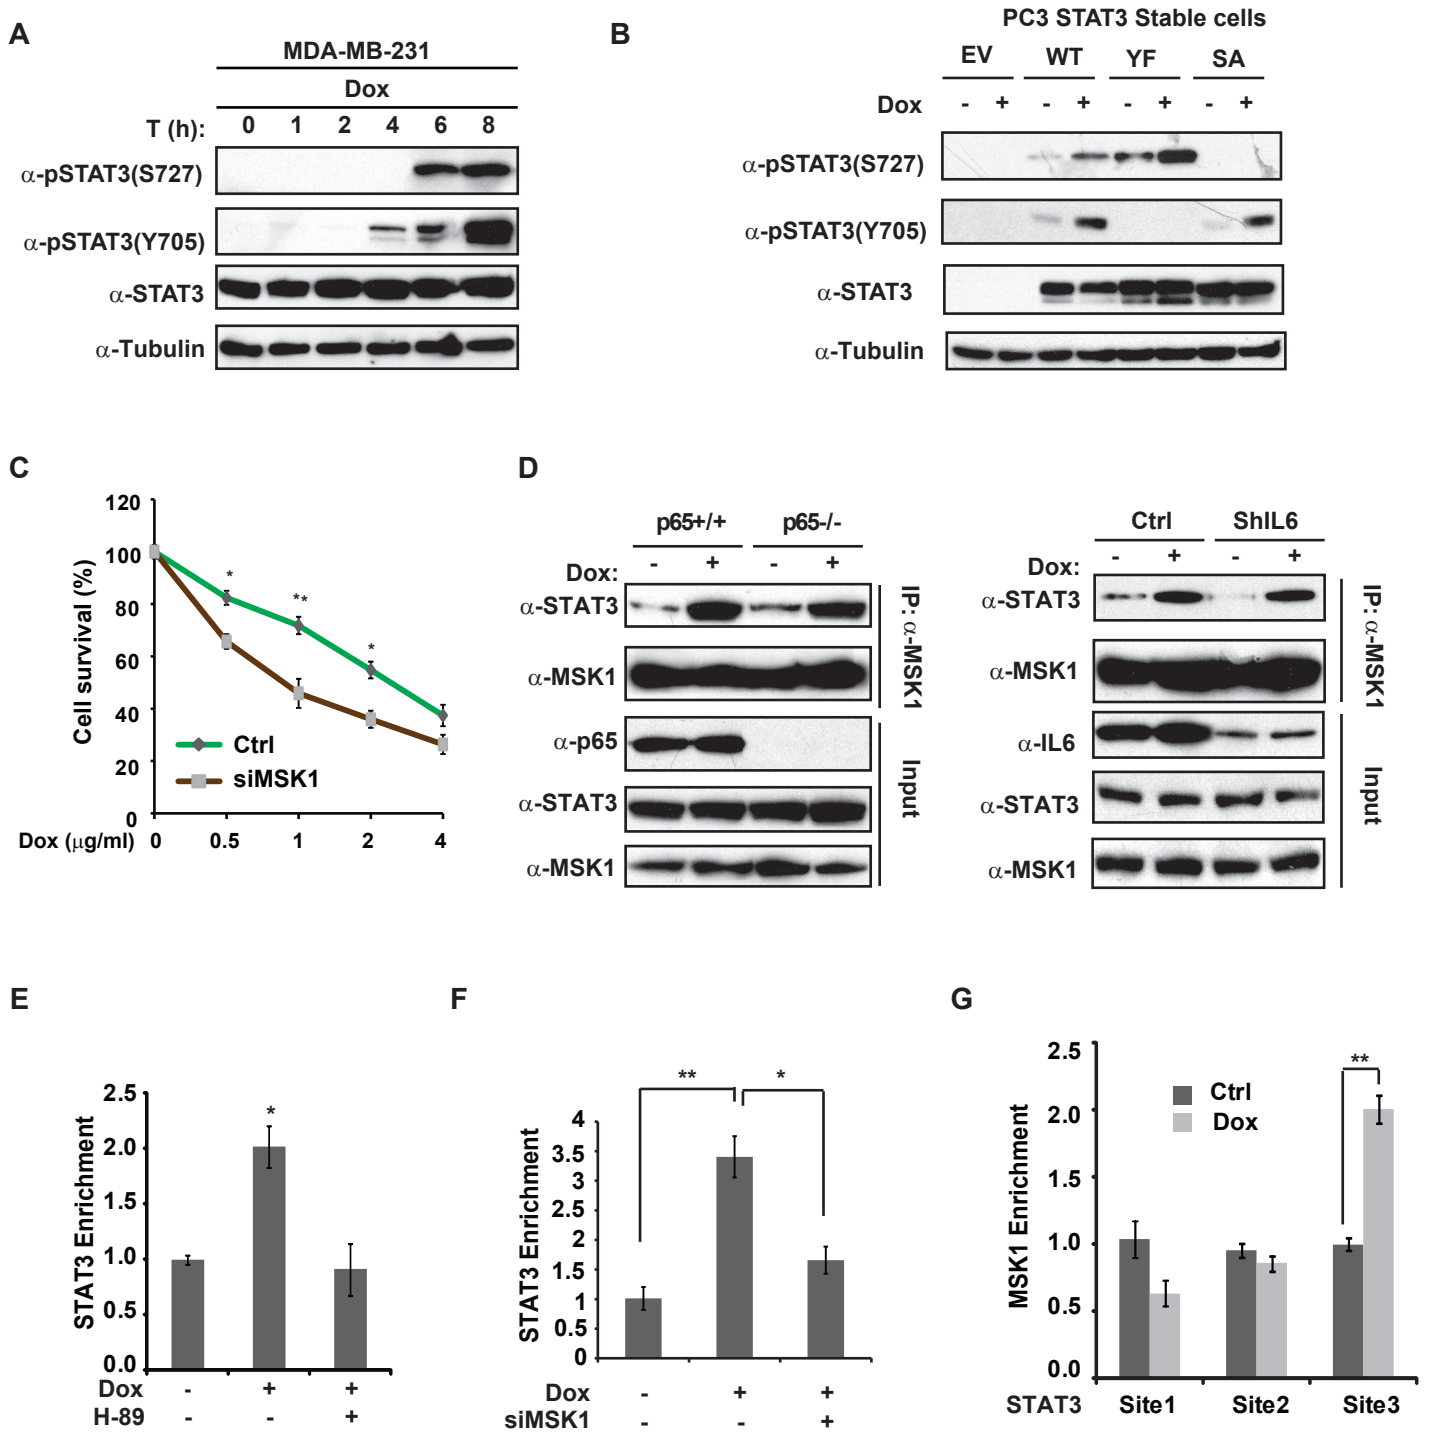

# sFigure 5

**A**

|                      |     |                                                       |     |
|----------------------|-----|-------------------------------------------------------|-----|
| Human NM_138761.3    | 328 | TCCCCCGAGAGGTCTTTTCCGAGTGGCAGCTGACATGTTTTCTGACGGCAAC  | 381 |
| Chimp XM_001155879.  | 322 | TCCCCCGAGAGGTCTTTTTCCGAGTGGCAGCTGACATGTTTTCTGACGGCAAC | 375 |
| Monkey NM_001261016. | 272 | TCCCCCGAGAGGTCTTTTTCCGAGTGGCAGCTGACATGTTTTCTGACGGCAAC | 325 |
| Mouse NM_007527.3    | 382 | TCCCCCGAGAGGTCTTCTTCCGGGTGGCAGCTGACATGTTTGCTGATGGCAAC | 435 |
| Rat NM_017059.2      | 348 | TCCCCCGAGAGGTCTTCTTCCGTGTGGCAGCTGACATGTTTGCAGACGGCAAC | 401 |
| Dog NM_001003011.1   | 314 | TCTCCCGTGAGGTCTTCTTCCGAGTGGCAGCTGAGATGTTTTCTGATGGCAAC | 367 |
| Fish NM_131562.2     | 285 | CCGACTCAAGACGTCTTCATCAGAGTGGCCCGTGAATCTTCTCTGATGGCAAG | 338 |

: \*:\* \*\*\*\* : \*\*\* \*\*:\*

|                                          |     |                                                      |     |
|------------------------------------------|-----|------------------------------------------------------|-----|
| transcript variant 1 NM_001291428.1      | 328 | TCCCCCGAGAGGTCTTTTCCGAGTGGCAGCTGACATGTTTTCTGACGGCAAC | 381 |
| transcript variant gamma NM_001291429.1  | 276 | TCCCCCGAGAGGTCTTTTCCGAGTGGCAGCTGACATGTTTTCTGACGGCAAC | 329 |
| transcript variant lambda NM_001291430.1 | 129 | TCCCCCGAGAGGTCTTTTCCGAGTGGCAGCTGACATGTTTTCTGACGGCAAC | 182 |
| transcript variant zeta NM_001291431.1   | 129 | TCCCCCGAGAGGTCTTTTCCGAGTGGCAGCTGACATGTTTTCTGACGGCAAC | 182 |
| transcript variant beta NM_004324.3      | 328 | TCCCCCGAGAGGTCTTTTCCGAGTGGCAGCTGACATGTTTTCTGACGGCAAC | 381 |
| transcript variant alpha NM_138761.3     | 328 | TCCCCCGAGAGGTCTTTTCCGAGTGGCAGCTGACATGTTTTCTGACGGCAAC | 381 |
| transcript variant delta NM_138763.3     | 181 | TCCCCCGAGAGGTCTTTTCCGAGTGGCAGCTGACATGTTTTCTGACGGCAAC | 234 |
| transcript variant sigma NM_138764.4     | 328 | TCCCCCGAGAGGTCTTTTCCGAGTGGCAGCTGACATGTTTTCTGACGGCAAC | 381 |

**B**

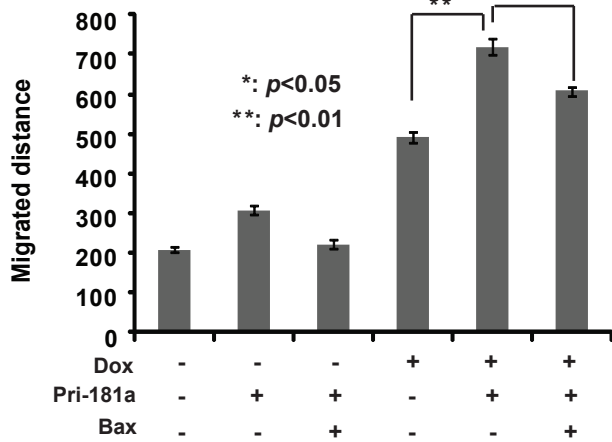

**C**

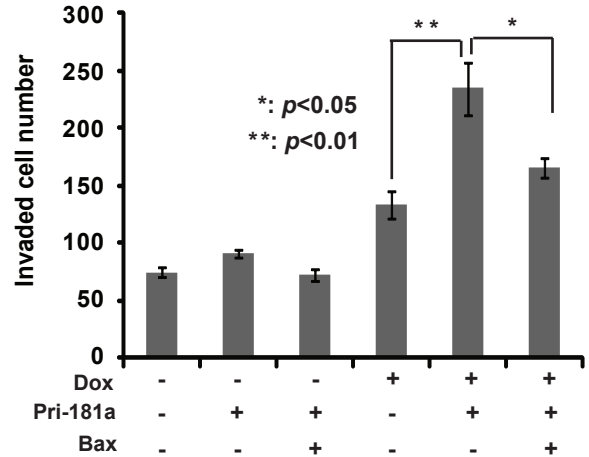

**D**

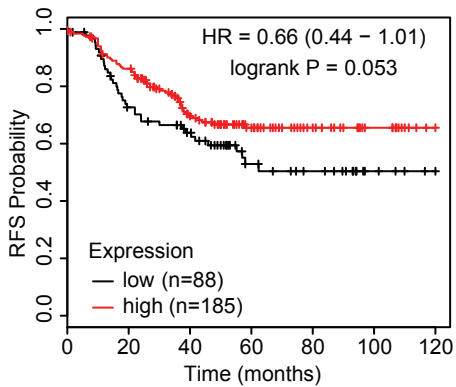

**E**

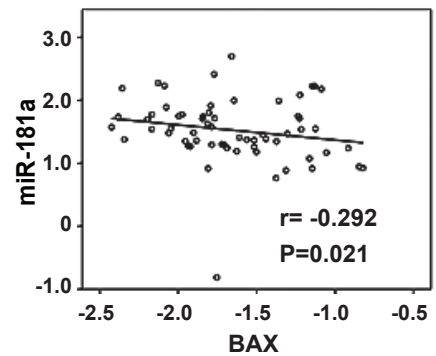

sFigure 6

A

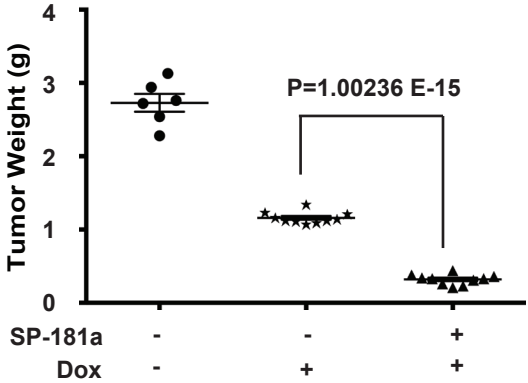

B

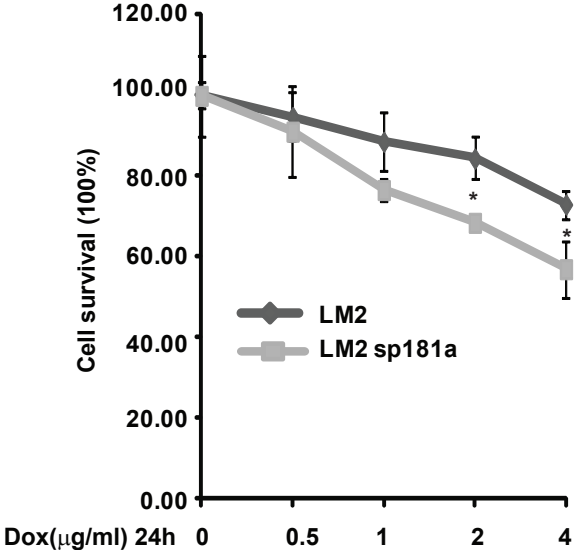

C

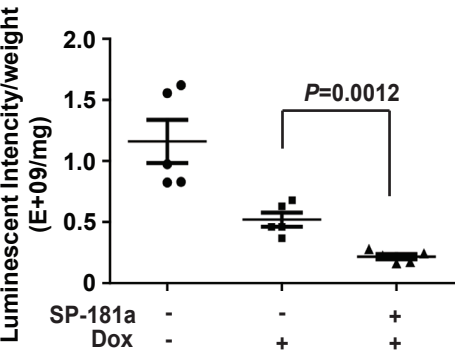

D

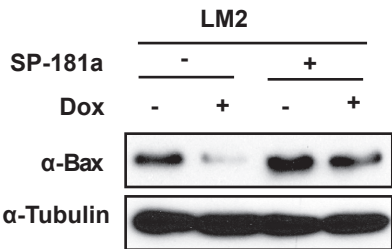

E

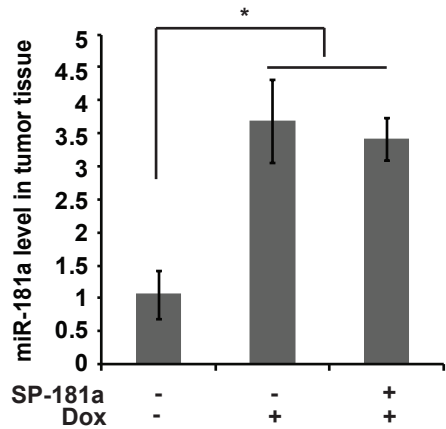

Supplement: NIHMS685380-supplement-2.pdf [file NIHMS685380-supplement-2.pdf]
